# Supplementary material for: Effects of Essential Oils from Zingiberaceae Plants on Root-Rot Disease of Panax notoginseng
Source: PubMed Central journal article supplement (PMC6102565; doi:10.3390/molecules23051021), 2018-04-26
Supplement: molecules-23-01021-s001.pdf [file molecules-23-01021-s001.pdf]

# Effects of essential oils from Zingiberaceae plants on root-rot disease of *Panax notoginseng*

Wu-Mei Sun<sup>1,2#</sup>, Yu-Nan Ma<sup>1#</sup>, Yan-Jiao Yin<sup>1,2</sup>, Chuan-Jiao Chen<sup>1</sup>, Fu-Rong Xu<sup>1</sup>, Xian Dong<sup>1\*</sup> and Yong-Xian Cheng<sup>1,2\*</sup>

<sup>1</sup> College of Pharmaceutical Sciences, Yunnan University of Traditional Chinese Medicine, Kunming 650500, People's Republic of China; dongxian\_1655129@163.com (X.D.).

<sup>2</sup> Guangdong Key Laboratory for Genome Stability & Disease Prevention, School of Pharmaceutical Sciences, Shenzhen University Health Science Center, Shenzhen, 518060, People's Republic of China; yxcheng@szu.edu.cn (Y.-X.C.)

**Table S1.** Chemical composition of the EOs of *A. tsao-ko*.

| NO. | Compound Name              | Component | Relative content |
|-----|----------------------------|-----------|------------------|
|     |                            | RT        | (%)              |
| 1   | 2-heptanone                | 5.82      | 0.03             |
| 2   | 2-heptanol                 | 6.04      | 0.22             |
| 3   | tricyclene                 | 6.62      | 0.24             |
| 4   | $\alpha$ -pinene           | 6.94      | 3.68             |
| 5   | camphene                   | 7.35      | 13.80            |
| 6   | sabinene                   | 8.04      | 0.12             |
| 7   | (-)- $\beta$ -pinene       | 8.12      | 0.58             |
| 8   | 5-hepten-2-one, 6-methyl-  | 8.42      | 0.55             |
| 9   | $\beta$ -myrcene           | 8.54      | 1.51             |
| 10  | octanal                    | 8.87      | 0.10             |
| 11  | $\alpha$ -phellandrene     | 8.91      | 0.47             |
| 12  | 3-carene                   | 9.08      | 0.04             |
| 13  | $\alpha$ -terpinene        | 9.27      | 0.03             |
| 14  | o-cymene                   | 9.51      | 0.11             |
| 15  | $\beta$ -phellandrene      | 9.64      | 8.48             |
| 16  | eucalyptol                 | 9.70      | 9.37             |
| 17  | 2-pyrrolidinone, 1-methyl- | 9.95      | 0.09             |
| 18  | 2-octenal, ( <i>E</i> )-   | 10.48     | 0.05             |
| 19  | $\gamma$ -terpinene        | 10.51     | 0.05             |
| 20  | terpinolene                | 11.38     | 0.35             |
| 21  | 2-nonanone                 | 11.49     | 0.08             |
| 22  | linalool                   | 11.72     | 0.68             |
| 23  | (+)-2-bornanone            | 13.03     | 0.23             |

|    |                                                                                          |       |       |
|----|------------------------------------------------------------------------------------------|-------|-------|
| 24 | bicyclo[2.2.1]heptan-2-ol, 2,3,3-trimethyl-                                              | 13.14 | 0.13  |
| 25 | 6-octenal, 3,7-dimethyl-, ( <i>R</i> )-                                                  | 13.27 | 0.42  |
| 26 | <i>endo</i> -borneol                                                                     | 13.39 | 0.06  |
| 27 | <i>endo</i> -borneol                                                                     | 13.65 | 3.04  |
| 28 | (-)-terpinen-4-ol                                                                        | 13.99 | 0.27  |
| 29 | isogeranial                                                                              | 14.13 | 0.21  |
| 30 | $\alpha$ -terpineol                                                                      | 14.37 | 1.82  |
| 31 | myrtenal                                                                                 | 14.54 | 0.17  |
| 32 | 3-isopropylbenzaldehyde                                                                  | 15.10 | 0.03  |
| 33 | citronellol                                                                              | 15.42 | 0.67  |
| 34 | benzene, 2-methoxy-4-methyl-1-(1-methylethyl)-                                           | 15.62 | 0.07  |
| 35 | <i>cis</i> -citral                                                                       | 15.80 | 8.60  |
| 36 | geraniol                                                                                 | 16.15 | 1.31  |
| 37 | geranial                                                                                 | 16.63 | 11.05 |
| 38 | ethanone, 1-(2-hydroxy-5-methylphenyl)-                                                  | 16.82 | 0.04  |
| 39 | 1-bornyl acetate                                                                         | 17.06 | 0.09  |
| 40 | thymol                                                                                   | 17.20 | 0.10  |
| 41 | 2-undecanone                                                                             | 17.23 | 0.19  |
| 42 | $\alpha$ -copaene                                                                        | 19.57 | 0.12  |
| 43 | acetic acid lavandulyl ester                                                             | 19.73 | 0.15  |
| 44 | $\beta$ -elemene                                                                         | 20.05 | 0.32  |
| 45 | ( <i>1R,5R</i> )-2-methyl-5-(( <i>R</i> )-6-methylhept-5-en-2-yl)bicyclo[3.1.0]hex-2-ene | 20.45 | 0.05  |
| 46 | caryophyllene                                                                            | 20.92 | 0.07  |
| 47 | ( <i>1S,5S</i> )-4-methylene-1-(( <i>R</i> )-6-methylhept-5-en-2-yl)bicyclo[3.1.0]hexane | 22.08 | 0.18  |
| 48 | sesquisabinene                                                                           | 22.28 | 0.08  |
| 49 | $\alpha$ -curcumene                                                                      | 23.01 | 2.56  |
| 50 | zingiberence                                                                             | 23.47 | 13.18 |
| 51 | (+)- <i>epi</i> -bicyclosesquiphellandrene                                               | 24.07 | 0.13  |
| 52 | $\beta$ -sesquiphellandrene                                                              | 24.50 | 4.45  |
| 53 | ( <i>E</i> )-1-methyl-4-(6-methylhept-5-en-2-ylidene)cyclohex-1-ene                      | 24.79 | 0.09  |
| 54 | elemol                                                                                   | 25.45 | 0.71  |
| 55 | <i>trans</i> -sesquisabinene hydrate                                                     | 25.61 | 0.19  |
| 56 | (1 <i>E</i> ,4 <i>E</i> )-germacrene                                                     | 25.75 | 0.19  |
| 57 | ( <i>E</i> )-nerolidol                                                                   | 25.99 | 0.40  |
| 58 | <i>trans</i> -sesquisabinene hydrate                                                     | 27.04 | 0.54  |

|    |                                                                              |       |      |
|----|------------------------------------------------------------------------------|-------|------|
| 59 | (1 <i>R</i> ,4 <i>R</i> )-1-methyl-4-(6-methylhept-5-en-2-yl)cyclohex-2-enol | 28.00 | 0.82 |
| 60 | $\beta$ -eudesmol                                                            | 29.47 | 0.38 |
| 61 | 3-cyclohexen-1-ol, 1-(1,5-dimethyl-4-hexenyl)-4-methyl-                      | 30.34 | 0.07 |
| 62 | phenol, 5-(1,5-dimethyl-4-hexenyl)-2-methyl-,( <i>R</i> )-                   | 33.91 | 0.02 |

**Table S2.** Chemical composition of the EOs of *A. officinarum*.

| NO. | Compound Name                   | Component | Relative content |
|-----|---------------------------------|-----------|------------------|
|     |                                 | RT        | (%)              |
| 1   | heptanal                        | 6.08      | 0.05             |
| 2   | $\alpha$ -pinene                | 6.94      | 1.49             |
| 3   | camphene                        | 7.34      | 0.30             |
| 4   | benzaldehyde                    | 7.67      | 0.08             |
| 5   | (-)- $\beta$ -pinene            | 8.13      | 4.67             |
| 6   | 3-heptanone                     | 8.20      | 0.01             |
| 7   | sulcatone                       | 8.43      | 0.03             |
| 8   | $\beta$ -myrcene                | 8.54      | 1.30             |
| 9   | octanal                         | 8.87      | 0.23             |
| 10  | $\alpha$ -phellandrene          | 8.91      | 0.15             |
| 11  | 3-carene                        | 9.08      | 0.06             |
| 12  | acetic acid, hexyl ester        | 9.19      | 0.01             |
| 13  | isoterpinolene                  | 9.27      | 0.02             |
| 14  | o-cymene                        | 9.51      | 0.27             |
| 15  | $\beta$ -phellandrene           | 9.63      | 0.96             |
| 16  | eucalyptol                      | 9.69      | 0.65             |
| 17  | <i>trans</i> - $\beta$ -ocimene | 9.90      | 0.03             |
| 18  | 2-pyrrolidinone, 1-methyl-      | 9.95      | 0.08             |
| 19  | $\beta$ -ocimene                | 10.20     | 0.08             |
| 20  | $\gamma$ -terpinene             | 10.51     | 0.05             |
| 21  | acetophenone                    | 10.73     | 0.02             |

|    |                                                |       |       |
|----|------------------------------------------------|-------|-------|
| 22 | 1-octanol                                      | 10.85 | 0.22  |
| 23 | <i>trans</i> -linalool oxide (furanoid)        | 10.92 | 0.30  |
| 24 | linalool                                       | 11.77 | 20.25 |
| 25 | fenchol                                        | 12.14 | 0.08  |
| 26 | ( <i>E</i> )-4,8-dimethylnona-1,3,7-triene     | 12.21 | 0.53  |
| 27 | (+)-2-bornanone                                | 13.03 | 0.19  |
| 28 | cycloprop[a]indene, 1,1a,6,6a-tetrahydro-      | 13.22 | 0.07  |
| 29 | benzenepropanal                                | 13.55 | 0.13  |
| 30 | <i>endo</i> -borneol                           | 13.65 | 0.37  |
| 31 | 1-nonanol                                      | 13.79 | 0.02  |
| 32 | (-)-terpinen-4-ol                              | 13.99 | 0.18  |
| 33 | $\alpha$ -terpineol                            | 14.37 | 1.12  |
| 34 | 4-decenal, ( <i>E</i> )-                       | 14.45 | 0.90  |
| 35 | decanal                                        | 14.78 | 1.06  |
| 36 | acetic acid, octyl ester                       | 14.95 | 0.90  |
| 37 | citronellol                                    | 15.41 | 0.54  |
| 38 | benzene, 2-methoxy-4-methyl-1-(1-methylethyl)- | 15.62 | 0.12  |
| 39 | neral                                          | 15.78 | 0.09  |
| 40 | 2-butanone, 4-phenyl-                          | 15.86 | 0.12  |
| 41 | 10-dodecenol                                   | 15.99 | 0.06  |
| 42 | geraniol                                       | 16.15 | 0.67  |
| 43 | 5-decen-1-ol, ( <i>E</i> )-                    | 16.22 | 1.92  |
| 44 | 2-decenal, ( <i>E</i> )-                       | 16.34 | 0.16  |
| 45 | 1-decanol                                      | 16.64 | 5.02  |
| 46 | bornyl acetate                                 | 17.05 | 0.10  |
| 47 | 1-bornyl acetate                               | 17.05 | 0.10  |
| 48 | thymol                                         | 17.21 | 0.07  |
| 49 | acetic acid, nonyl ester                       | 17.69 | 0.05  |
| 50 | <i>trans</i> -geranic acid methyl ester        | 18.05 | 0.08  |
| 51 | (+/-)- $\delta$ -elemene                       | 18.46 | 0.01  |
| 52 | citronellol acetate                            | 18.85 | 0.15  |
| 53 | 3-phenyl-1-propanol, acetate                   | 19.36 | 0.57  |
| 54 | $\alpha$ -copaene                              | 19.57 | 0.57  |
| 55 | ( <i>Z</i> )-dec-4-en-1-yl propyl carbonate    | 19.90 | 3.70  |
| 56 | benzene propanol, $\alpha$ -methyl-, acetate   | 20.11 | 0.16  |
| 57 | decyl acetate                                  | 20.56 | 7.03  |
| 58 | caryophyllene                                  | 20.95 | 12.79 |
| 59 | (+)- <i>epi</i> -bicy closesquiphel landrene   | 21.23 | 0.05  |

|    |                                                                                   |       |      |
|----|-----------------------------------------------------------------------------------|-------|------|
| 60 | $\gamma$ -elemene                                                                 | 21.35 | 0.04 |
| 61 | 1,4,7,-cycloundecatriene, 1,5,9,9-tetramethyl-,Z,Z,Z-                             | 22.05 | 5.11 |
| 62 | 8-dodecenol                                                                       | 22.16 | 0.11 |
| 63 | ethyl cinnamate                                                                   | 22.37 | 0.78 |
| 64 | 1-dodecanol                                                                       | 22.64 | 0.11 |
| 65 | (+)- $\gamma$ -cadinene                                                           | 22.81 | 0.29 |
| 66 | $\alpha$ -curcumene                                                               | 23.00 | 2.40 |
| 67 | (+)- $\beta$ -selinene                                                            | 23.17 | 0.19 |
| 68 | zingiberene                                                                       | 23.45 | 0.84 |
| 69 | pentadecane                                                                       | 23.56 | 0.57 |
| 70 | aciphyllene                                                                       | 23.60 | 0.51 |
| 71 | aromandendrene                                                                    | 23.91 | 0.40 |
| 72 | (+)- $\gamma$ -cadinene                                                           | 24.15 | 0.35 |
| 73 | 1-isopropyl-4,7-dimethyl-1,2,3,5,6,8a-                                            | 24.49 | 1.00 |
| 74 | (+)-valencene                                                                     | 24.92 | 0.11 |
| 75 | $\alpha$ -calacorene                                                              | 25.22 | 0.10 |
| 76 | (1E,4E)-germacreneb                                                               | 25.75 | 0.08 |
| 77 | nerolidol                                                                         | 26.01 | 4.14 |
| 78 | caryophyllene oxide                                                               | 26.77 | 2.66 |
| 79 | guaiol                                                                            | 27.37 | 0.23 |
| 80 | (1S,3aS,4S,5S,7aR,8R)-5-isopropyl-1,7a-dimethyloctahydro-1h-1,4-methanoinden-8-ol | 27.61 | 0.20 |
| 81 | n-butyl cinnamate                                                                 | 28.55 | 0.11 |
| 82 | di- <i>epi</i> -1,10-cubenol                                                      | 28.60 | 0.17 |
| 83 | farnesol                                                                          | 32.61 | 0.37 |
| 84 | ethyl <i>p</i> -methoxycinnamate                                                  | 34.01 | 0.06 |
| 85 | trifluoroacetyl-lavandulol                                                        | 38.00 | 0.03 |
